# Supplementary material
Source: PubMed Central journal article supplement (PMC6039666)
Supplement: ba014845-suppl1.pdf [file ba014845-suppl1.pdf]

## **Supplemental Tables**

1. Supplemental Table 1. Serious Toxicities Phase I Lenalidomide/Rituximab Trial.
2. Supplemental Table 2. Mini-Mental Status Score Results for Phase I Trial Subjects at Baseline and for the first five months of study treatment.
3. Supplemental Table 3. Control and CNS Lymphoma Subjects: CSF Metabolomic Discovery Set.
4. Supplemental Table 4. PCNSL Cases Used to Evaluate IDO1 Expression by Immunohistochemistry.
5. Supplemental Table 5. Restaging Studies During Lenalidomide Maintenance therapy.

## **Supplemental Figures**

1. Supplemental Figure 1. Lenalidomide Induces an Increase in the CD8:CD4 T-Cell Ratio in the CSF of Relapsed CNS Lymphoma Patients.
2. Supplemental Figure 2. Validation set of CNS Lymphoma and Controls Confirmed Increased CSF Lactate in CNS Lymphoma Microenvironment.
3. Supplemental Figure 3. Example of a Durable Remission with Lenalidomide Maintenance attained after Fourth Progression of Methotrexate-Resistant CNS Lymphoma that was Treated with Involved-Field, not Whole Brain Irradiation.
4. Supplemental Figure 4. Example of Resolution of Leptomeningeal Lymphoma, induced by Lenalidomide monotherapy, confirmed by flow-cytometry.

**Supplemental Table 1. Serious Toxicities Phase I Lenalidomide/Rituximab Trial**

| Pt No. | Lenalidomide Dose Level (mg/day) | Months on Lenalidomide Monotherapy | Months on Lenalidomide /Rituximab | Grade 3 or 4 Adverse Events        |
|--------|----------------------------------|------------------------------------|-----------------------------------|------------------------------------|
| 1      | 10                               | 2                                  | 4                                 | None                               |
| 2      | 10                               | 1                                  | 0                                 | None                               |
| 3      | 10                               | 21                                 | 0                                 | None                               |
| 4      | 20                               | 48 +                               | 0                                 | None                               |
| 5      | 20                               | 2                                  | 0.5                               | Gr. 3 Infection                    |
| 6      | 20                               | 1.75                               | 0                                 | Gr. 3 Confusion (DLT)              |
| 7      | 20                               | 1                                  | 0.5                               | Gr. 3 Neutropenia                  |
| 8      | 20                               | 9                                  | 0.25                              | None                               |
| 9      | 20                               | 0.25                               | 0                                 | Not evaluable                      |
| 10     | 20                               | 18                                 | 0                                 | Gr. 4 Infection (DLT)              |
| 11     | 15                               | 1                                  | 0                                 | Gr. 5 Tumor Progression            |
| 12     | 15                               | 1                                  | 2                                 | Gr. 3 Neutropenia, Gr. 4 Pneumonia |
| 13     | 15                               | 13                                 | 0                                 | Gr. 4 Neutropenia, Gr. 3 Zoster    |
| 14     | 15                               | 21+                                | 0                                 | None                               |

**Supplemental Table 2.** Mini-Mental Status Score Results for Phase I Trial Subjects at Baseline and for the first five months of study treatment with lenalidomide and/or lenalidomide/rituximab.

| Pt | Baseline | Month 1 | Month 2 | Month 3 | Month 4 | Month 5 |
|----|----------|---------|---------|---------|---------|---------|
| 1  | 30       | 30      | 30      | 30      | 30      | 30      |
| 2  | 28       | 28      |         |         |         |         |
| 3  | 28       | 29      | 30      | 30      | 30      | 30      |
| 4  | 30       | 30      | 30      | 30      | 30      | 30      |
| 5  | 17       | 17      | 21      | 22      |         |         |
| 6  | 23       | 14      | 7       |         |         |         |
| 7  | 27       | 27      | 26      |         |         |         |
| 8  | 28       | 30      | 28      | 30      | 29      | 30      |
| 9  | 26       |         |         |         |         |         |
| 10 | 23       | 28      | 26      | 29      | 26      | 22      |
| 11 | 20       | 0       |         |         |         |         |
| 12 | 17       | 20      | 21      | 17      |         |         |
| 13 | 30       | 30      | 30      | 30      | 30      | 30      |
| 14 | 25       | 30      | 30      | 30      | 30      | 30      |

**Supplemental Table 3.** Control and CNS Lymphoma Subjects: CSF Metabolomic Discovery Set (from Figure 2).

| <b>Group</b> | <b>Non-Neoplastic Controls</b> |                                                             |
|--------------|--------------------------------|-------------------------------------------------------------|
|              | Age/Sex                        | Diagnosis                                                   |
| A1           | 65/M                           | Staging, Myelodysplastic Syndrome                           |
| A2           | 65/M                           | Inflammatory Arthritis                                      |
| A3           | 73/F                           | Staging, AML                                                |
| A4           | 39/F                           | Staging, AML                                                |
| A5           | 45/F                           | Staging, ALL                                                |
| A6           | 59/M                           | Staging, Systemic DLBCL                                     |
| A7           | 44/M                           | Limbic Encephalitis                                         |
| A8           | 43/M                           | Multiple Sclerosis                                          |
| A9           | 17/M                           | Staging, ALL                                                |
| A10          | 20/M                           | Staging, ALL                                                |
| A11          | 73/M                           | Staging, AML                                                |
| A12          | 65/M                           | Staging, AML                                                |
| A13          | 65/M                           | Staging, AML                                                |
| A14          | 38/M                           | Multiple Sclerosis                                          |
| <b>Group</b> | <b>CNS Lymphoma</b>            |                                                             |
|              | Age/Sex                        | Diagnosis                                                   |
| B1           | 82/M                           | PCNSL/DLBCL                                                 |
| B2           | 84/M                           | PCNSL/DLBCL                                                 |
| B3           | 63/M                           | PCNSL/DLBCL                                                 |
| B4           | 68/F                           | PCNSL/DLBCL, + Malignant Cytology                           |
| B5           | 71/M                           | PCNSL/DLBCL, + Malignant Cytology                           |
| B6           | 63/M                           | PCNSL/DLBCL                                                 |
| B7           | 68/F                           | PCNSL/DLBCL                                                 |
| B8           | 72/M                           | PCNSL/DLBCL, + Malignant Cytology                           |
| B9           | 60/F                           | PCNSL/DLBCL, + Malignant Cytology                           |
| B10          | 75/F                           | PCNSL/DLBCL                                                 |
| B11          | 69/F                           | Relapsed PCNSL/DLBCL, + Malignant Cytology                  |
| B12          | 63/F                           | Relapsed PCNSL/DLBCL, + Malignant Cytology                  |
| B13          | 73/M                           | Relapsed SCNSL/Marginal Zone Lymphoma, + Malignant Cytology |
| B14          | 55/M                           | Relapsed PCNSL/DLBCL, + Malignant Cytology                  |

**Supplemental Table 4.** PCNSL Cases used to evaluate IDO1 Expression by Immunohistochemistry.

| <b>Case</b> | <b>Diagnosis</b>     | <b>Age/Sex</b> | <b>IDO1 Immunoreactivity</b>            |
|-------------|----------------------|----------------|-----------------------------------------|
| 1           | PCNSL/DLBCL          | 85/M           | 5%, lymphoma cells only                 |
| 2           | PCNSL/DLBCL          | 68/F           | 5%, lymphoma cells only                 |
| 3           | PCNSL/DLBCL          | 74/M           | 100%, tumor-associated macrophages only |
| 4           | PCNSL/DLBCL          | 72/F           | 5%, lymphoma cells only                 |
| 5           | PCNSL/DLBCL          | 60/F           | 100%, tumor-associated macrophages only |
| 6           | PCNSL, DLBCL, EBV+   | 67/F           | >40%, lymphoma and tumor macrophages    |
| 7           | PCNSL/DLBCL          | 63/M           | >40%, lymphoma and tumor macrophages    |
| 8           | PCNSL/DLBCL          | 80/F           | >40%, lymphoma and tumor macrophages    |
| 9           | PCNSL/DLBCL          | 66/F           | Negative immunoreactivity               |
| 10          | PCNSL/DLBCL          | 54/F           | >40%, lymphoma and tumor macrophages    |
| 11          | PCNSL/DLBCL          | 41/M           | >40%, lymphoma and tumor macrophages    |
| 12          | PCNSL/DLBCL          | 48/F           | >40%, lymphoma and tumor macrophages    |
| 13          | PCNSL/DLBCL          | 70/M           | >40%, lymphoma and tumor macrophages    |
| 14          | PCNSL/DLBCL          | 61/F           | >40%, lymphoma and tumor macrophages    |
| 15          | PCNSL/DLBCL          | 65/M           | 100%, tumor-associated macrophages only |
| 16          | PCNSL/DLBCL          | 63/M           | >40%, lymphoma and tumor macrophages    |
| 17          | PCNSL/DLBCL          | 71/M           | >40%, lymphoma and tumor macrophages    |
| 18          | PCNSL, lymphoblastic | 54/M           | >40%, lymphoma and tumor macrophages    |
| 19          | PCNSL/DLBCL          | 54/F           | 100% tumor-associated macrophages only  |
| 20          | PCNSL/DLBCL          | 86/F           | >40%, lymphoma and tumor macrophages    |

**Supplemental Table 5. Restaging Studies During Lenalidomide Maintenance**

| <b>Pt</b> | <b>Response Duration</b> | <b>Restaging Studies During Lenalidomide Maintenance</b> |
|-----------|--------------------------|----------------------------------------------------------|
| <b>1</b>  | 12 months                | 7 Brain MRI, 1 Ophthalmologic examination                |
| <b>2</b>  | 39 months+               | 9 Brain MRI                                              |
| <b>3</b>  | 8 months                 | 3 Brain MRI, 2 Ophthalmologic examinations               |
| <b>4</b>  | 32 months+               | 7 Brain MRI, 3 Ophthalmologic examinations               |
| <b>5</b>  | 9 months                 | 3 Brain MRI, 5 Ophthalmologic examinations               |
| <b>6</b>  | 13 months                | 3 Brain MRI                                              |
| <b>7</b>  | 2 months                 | 1 Brain MRI                                              |
| <b>8</b>  | 6 months                 | 2 Brain MRI                                              |
| <b>9</b>  | 25 months+               | 4 Brain MRI, 6 Ophthalmologic examinations               |
| <b>10</b> | 14 months+               | 3 Brain MRI, 8 Ophthalmologic examinations               |

**Supplemental Figure 1.** Lenalidomide induces an increase in the CD8:CD4 T-cell ratio in CSF in CNS lymphoma patients.

Application of multicolor flow-cytometry to analyze T cell subsets in CSF ([66] during the first four weeks of cycle 1 lenalidomide monotherapy demonstrated reproducible increases in the ratio of CD8+ relative to CD4+ T cells, compared to week 1, pretreatment baseline, in four out of five relapsed, refractory CNS lymphoma patients. (1A). Of note, the normal CD4:CD8 ratio in the CSF of HIV negative, healthy subjects is approximately 3:1 [66]. (1B).

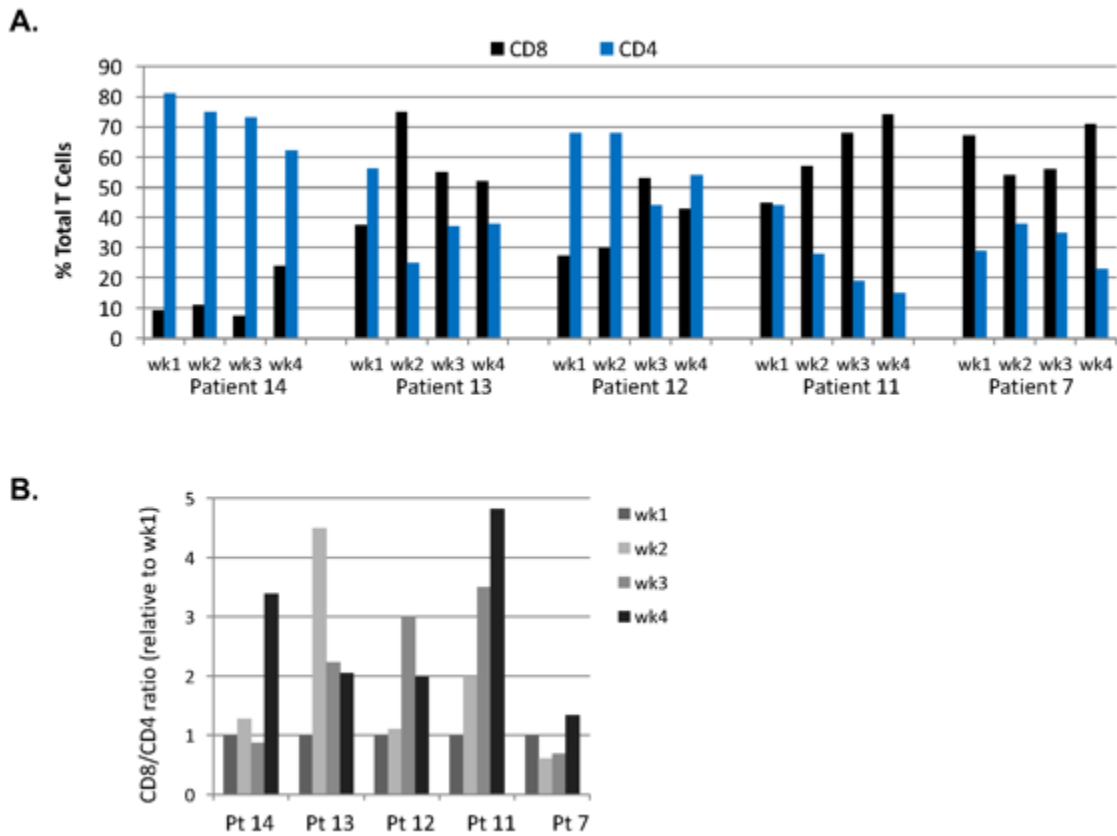

**Supplemental Figure 2.** Validation of elevated CSF lactate in CNS Lymphomas as determined by Beckman Coulter Clinical Chemistry Analyzer. **Controls.** CSF from 8 cases of non-neoplastic conditions (3M, 5F; median age 53, range 26-77; including negative staging AML (3 cases), multiple sclerosis (3 cases), amyotrophic lateral sclerosis (1 case), fibromyalgia (1 case): median CSF lactate concentration, controls: 1.3 mmole/l. **CNS lymphomas.** CSF from 8 independent cases of CNS DLBCL, four newly-diagnosed and four at relapse (4M, 4F; median age: 63, range 51-76): median CSF lactate concentration, CNS lymphoma: 2.85 mmole/l.

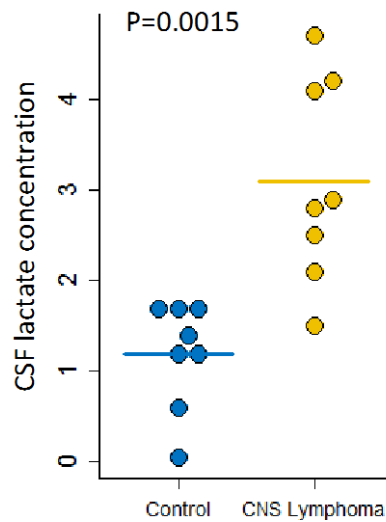



**Supplemental Figure 3.** Example of a durable remission with Lenalidomide maintenance: after fourth progression of methotrexate-resistant CNS lymphoma. A. MRI of relapsed PCNSL patient 4 (Table 3): one month after salvage high-dose methotrexate plus rituximab. (Longest previous response duration was 8 months (CR1)). B. After involved-field irradiation, CR5 was achieved as assessed by MRI, followed by lenalidomide maintenance, resulting in response duration  $\geq 32$  months.

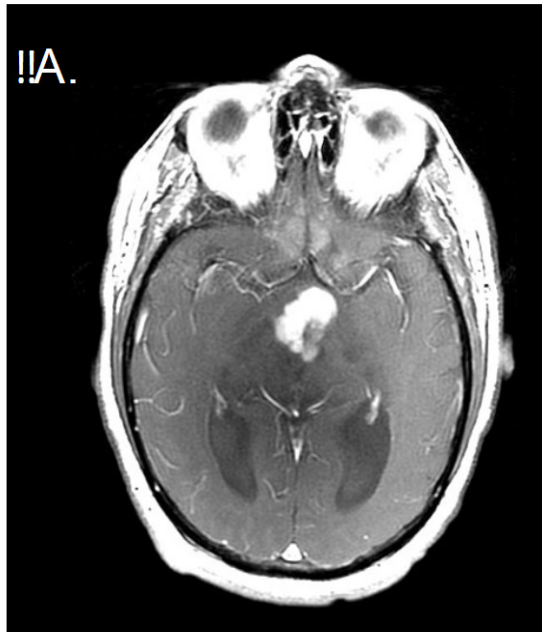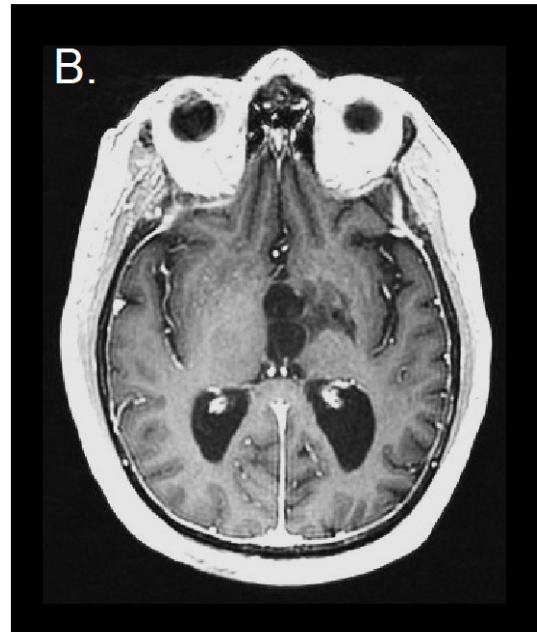

**Supplemental Figure 4.** Example of Resolution of Leptomeningeal Lymphoma Induced by Lenalidomide Monotherapy, Confirmed by Flow-Cytometry.

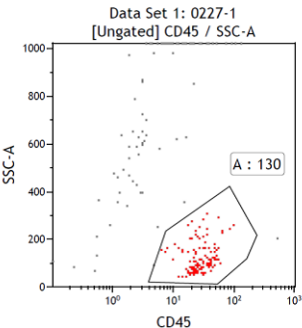

Baseline

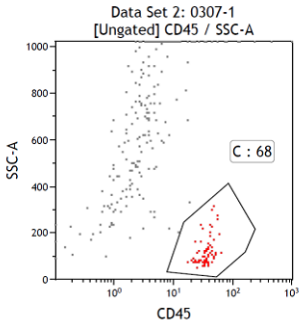

Wk1

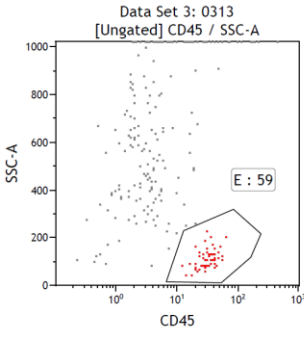

Wk2

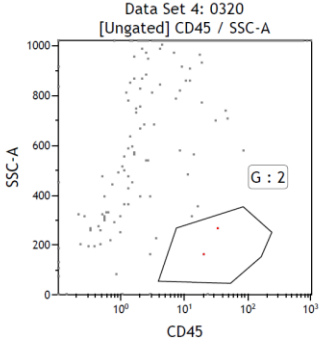

Wk3

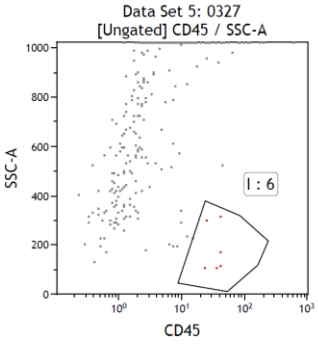

Wk4
